# Supplementary material
Source: Springer Nature journal article supplement (https://www.springermedizin.de/resource/supplementary/12874_2008_336_MOESM2_ESM.pdf/9434256)

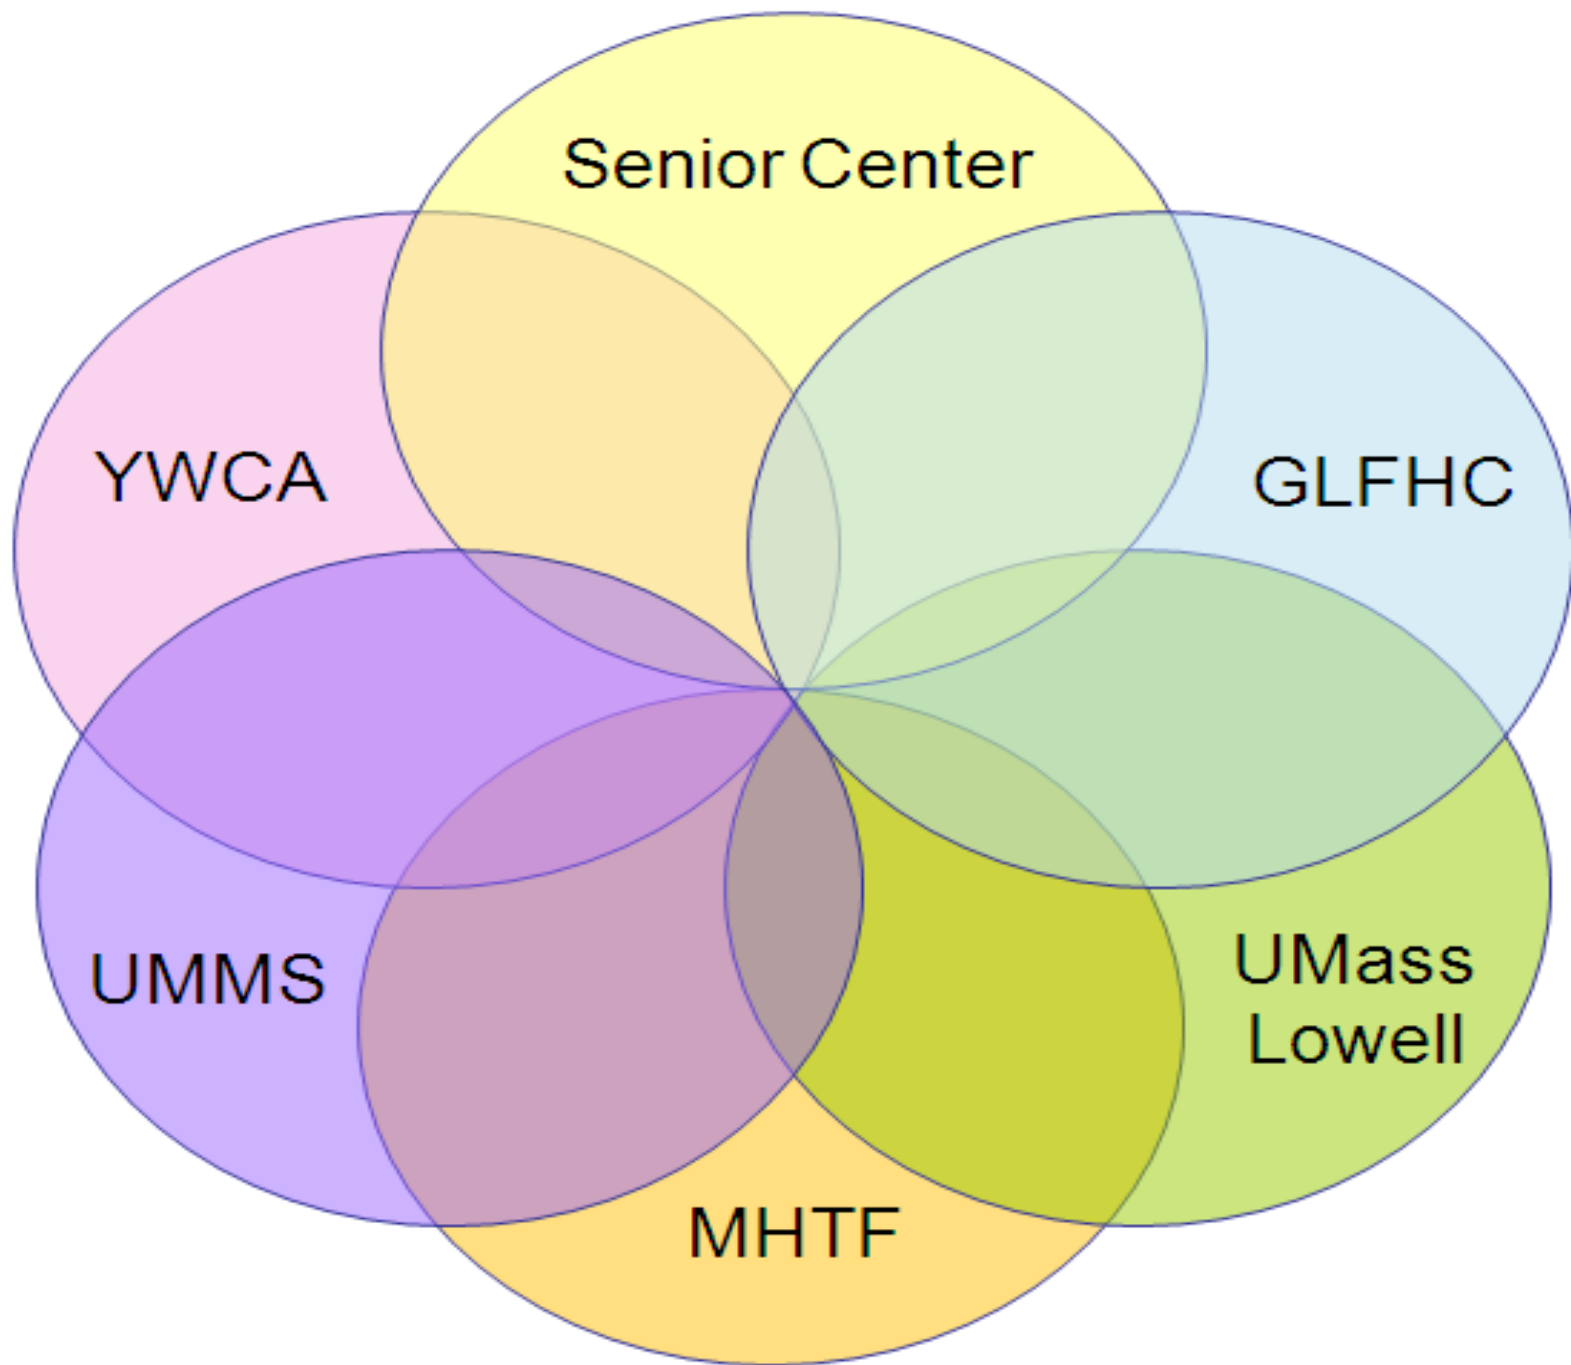

Supplement: MOESM2 [file 9434256]
